# Supplementary material for: The public uptake of information about antibiotic resistance in the Netherlands
Source: PubMed Central journal article supplement — Public Underst Sci. 2019 Feb 12;28(4):486–503. doi: 10.1177/0963662518823701 (PMC7323777; doi:10.1177/0963662518823701), 2019-02-12
Supplement: PUS-18-0133.R1_Supplementary_Files.pdf [file PUS-18-0133.R1_Supplementary_Files.pdf]

Manuscript PUS-18-0133.R1: *The public uptake of information about antibiotic resistance in the Netherlands.*

## **Supplementary files**

### **Appendix 1 Text of intervention**

#### **Source:**

<https://www.youtube.com/watch?v=PcTrpumqXW8&feature=youtu.be>

**Type:** Film. **Duration:** 1:29m.

#### **Translation of spoken text into English:**

**Title:** “How does antibiotic resistance emerge?”

Bacteria are very small organisms that often multiply rapidly. Every person carries good and bad bacteria. The presence of bad bacteria can cause an infection which can make you sick. A bacterial infection can be combatted with antibiotics. The antibiotics destroy bacteria or slow them down in their growth. This provides your body the chance to recover. In some cases the bacteria are not sensitive to an antibiotic. These bacteria are resistant because they have protected themselves against the antibiotic. While the sensitive bacteria have been destroyed by the antibiotic, it leaves room for the resistant bacteria to multiply. Then the infection is caused by resistant bacteria. This type of infection is more difficult to treat because the usual antibiotics are no longer working and doctors have to choose for antibiotics of which there is less experience with or have more side effects. Too much or wrong use of antibiotics increases the chance that the bacteria become resistant. That is why it is important to carefully consider whether the use of antibiotics is necessary. This way, the treatment of infections remains also possible in the future.

## Appendix 2. Measuring cultural predispositions and health beliefs

| Cultural predisposition | Variable | Question                                                                                                   | Answer categories                                                       | Remark                                                      |
|-------------------------|----------|------------------------------------------------------------------------------------------------------------|-------------------------------------------------------------------------|-------------------------------------------------------------|
|                         |          | <b>Anomie</b>                                                                                              | Strongly agree (1) - Strongly disagree (5)                              | Scores were recoded - higher score = higher level of anomie |
|                         | v1       | These days you don't really know whom you can count on                                                     |                                                                         |                                                             |
|                         | v2       | To get a better life you have to be lucky                                                                  |                                                                         |                                                             |
|                         | v3       | It is irresponsible to get children at this time in the world                                              |                                                                         |                                                             |
|                         | v4       | Nowadays, what you feel or think does not count anymore                                                    |                                                                         |                                                             |
|                         |          | <b>Utilitarian individualism</b>                                                                           | Strongly agree (1) - Strongly disagree (5)                              |                                                             |
|                         | v5       | I usually impose my self-interest above that of others                                                     |                                                                         | recoded                                                     |
|                         | v6       | I enjoy it when I do other people a favour                                                                 |                                                                         | recoded                                                     |
|                         | v7       | If I do something for someone, then I want something in return                                             |                                                                         |                                                             |
|                         | v8       | I don't often think about the interests of others                                                          |                                                                         | recoded                                                     |
|                         | v9       | I quickly attract the problems of others                                                                   |                                                                         |                                                             |
|                         |          | <b>Institutional trust</b>                                                                                 | (1) No trust, (2) Low trust, (3) Neutral, (4) Trust, (5) A lot of trust |                                                             |
|                         |          | To what extent do you have trust in these institutions in the Netherlands?                                 |                                                                         |                                                             |
|                         | v34      | Politics                                                                                                   |                                                                         |                                                             |
|                         | v35      | Science                                                                                                    |                                                                         |                                                             |
|                         | v36      | Judiciary power                                                                                            |                                                                         |                                                             |
|                         | v37      | Media                                                                                                      |                                                                         |                                                             |
|                         | v38      | RIVM (National Institute for Public Health and the Environment)                                            |                                                                         |                                                             |
|                         |          | <b>Environmental concern</b>                                                                               | (1) Strongly agree - (5) Strongly disagree                              |                                                             |
|                         | v25      | It is just too difficult for someone like me to do much about the environment                              |                                                                         |                                                             |
|                         | v26      | I do what is right for the environment, even when it costs more money or takes more time                   |                                                                         | recoded                                                     |
|                         | v27      | We worry too much about the future of the environment and not enough about economic issues like employment |                                                                         |                                                             |
|                         | v28      | People worry too much about economic progress harming the environment                                      |                                                                         |                                                             |

|                                                      |          |                                                                                                                                    |                                            |                                                                |
|------------------------------------------------------|----------|------------------------------------------------------------------------------------------------------------------------------------|--------------------------------------------|----------------------------------------------------------------|
|                                                      | v29      | Modern science will solve our environmental problems with little change to our way of life                                         |                                            |                                                                |
|                                                      | v30      | In order to protect the environment, the Netherlands needs economic growth                                                         |                                            |                                                                |
|                                                      | v31      | How willing would you be to pay much higher prices in order to protect the environment?                                            | (1) Very willing – (5) Very unwilling      | recoded                                                        |
|                                                      | v32      | How willing would you be to pay much higher taxes in order to protect the environment?                                             |                                            | recoded                                                        |
|                                                      | v33      | How willing would you be to accept cuts in your standard of living in order to protect the environment?                            |                                            | recoded                                                        |
| <b>Holism</b>                                        |          |                                                                                                                                    |                                            |                                                                |
|                                                      | v20      | Body, spirit and mind are connected to each other                                                                                  | (1) Strongly agree - (5) Strongly disagree | recoded                                                        |
|                                                      | v21      | The believe in the spiritual or in God is nothing for me, there is nothing outside our earthly existence                           |                                            |                                                                |
|                                                      | v22      | Some alternative medicine work at least as well as regular treatment methods                                                       |                                            | recoded                                                        |
|                                                      | v23      | There is a kind of spirit or life force that is present everywhere                                                                 |                                            | recoded                                                        |
|                                                      | v24      | The divine is not somewhere out there, but within every person                                                                     |                                            | recoded                                                        |
| Measuring health beliefs about antibiotic resistance |          |                                                                                                                                    |                                            |                                                                |
| Health belief                                        | Variable | Question                                                                                                                           | Answer categories                          | Remark                                                         |
| <b>Perceived severity</b>                            |          |                                                                                                                                    |                                            |                                                                |
|                                                      | v61      | I think the threat of antibiotic resistance is ...                                                                                 |                                            | Total scale recoded - higher score = higher perceived severity |
|                                                      | v62      | That people save leftovers from an antibiotic cure to take it at a later time on their own initiative, is ...                      |                                            |                                                                |
|                                                      | v63      | That people prematurely and on their own initiative stop with an antibiotic cure without consulting a general practitioner, is ... |                                            |                                                                |
|                                                      | v64      | That antibiotic resistance can pose great danger to public health is ...                                                           |                                            |                                                                |
|                                                      | v66      | The reporting about the risks of antibiotic resistance is exaggerated                                                              | (1) Strongly agree - (5) Strongly disagree |                                                                |
|                                                      | v74      | How likely do you think that antibiotic resistance will continue to pose a major public health risk in the future?                 | (1) Very unlikely - (5) Very likely        |                                                                |

| <b>Perceived susceptibility</b>                                                 |                                                                                                                                                          | (1) Very unlikely - (5) Very likely        | Scale recoded - higher score = higher perceived susceptibility |
|---------------------------------------------------------------------------------|----------------------------------------------------------------------------------------------------------------------------------------------------------|--------------------------------------------|----------------------------------------------------------------|
|                                                                                 | How likely do you think you can get an antibiotic-resistant bacterium by ...                                                                             |                                            |                                                                |
| v75                                                                             | physical contact with a person who is already infected                                                                                                   |                                            |                                                                |
| v76                                                                             | hospitalization                                                                                                                                          |                                            |                                                                |
| v77                                                                             | physical contact with an animal                                                                                                                          |                                            |                                                                |
| v78                                                                             | bad hand hygiene                                                                                                                                         |                                            |                                                                |
| <b>Awareness of risk of non-prudent antibiotic use to antibiotic resistance</b> |                                                                                                                                                          | (1) Strongly disagree - (5) Strongly agree |                                                                |
| v79                                                                             | When I use antibiotics unnecessarily, excessively or incorrectly, the risk of developing antibiotic resistance is increased                              |                                            |                                                                |
| v80                                                                             | When others use antibiotics unnecessarily, excessively or incorrectly, the risk of developing antibiotic resistance is increased                         |                                            |                                                                |
| v81                                                                             | When I'm feeling ill, I'm willing to wait not to use an antibiotic unnecessarily                                                                         |                                            |                                                                |
| v82                                                                             | When I use antibiotics unnecessarily, excessively or incorrectly, then I endanger public health                                                          |                                            |                                                                |
| v83                                                                             | When others use antibiotics unnecessarily, excessively or incorrectly, then they endanger public health                                                  |                                            |                                                                |
| <b>Proxy on prudent use of antibiotics</b>                                      |                                                                                                                                                          | (1) Strongly disagree - (5) Strongly agree |                                                                |
| v84                                                                             | It is useful to save leftovers from an antibiotic cure for a later moment in time                                                                        |                                            | recoded                                                        |
| v85                                                                             | When I experience side-effects during an antibiotic treatment, I will stop the antibiotic treatment on my own initiative, without consulting with the GP |                                            | recoded                                                        |
| v86                                                                             | When I feel better during the antibiotic treatment, it is unnecessary to finish the course                                                               |                                            | recoded                                                        |
| v87                                                                             | I decide on for myself whether I need antibiotics                                                                                                        |                                            | recoded                                                        |
| v88                                                                             | I will accept the decision made by the GP when the GP tells me I don't need antibiotics                                                                  |                                            |                                                                |

Note: Original survey is in Dutch

**Appendix 3:** Pearson *r* correlation coefficients between cultural predispositions, level of knowledge on antibiotics and antibiotic resistance, and on health beliefs towards antibiotic resistance

| <i>Variables</i>               |                                                    | (1)       | (2)       | (3)       | (4)       | (5)       | (6)       |
|--------------------------------|----------------------------------------------------|-----------|-----------|-----------|-----------|-----------|-----------|
| <i>Cultural predisposition</i> | Holism (1)                                         | 1         | 0.127***  | -0.081**  | 0.006     | -0.249*** | 0.057*    |
|                                | Environmental concern (2)                          | 0.127***  | 1         | 0.231***  | -0.289*** | -0.229*** | 0.190***  |
|                                | Institutional trust (3)                            | -0.081**  | 0.231***  | 1         | -0.443*** | -0.046    | 0.140***  |
|                                | Anomie (4)                                         | 0.006     | -0.289*** | -0.443*** | 1         | 0.151***  | -0.170*** |
|                                | Utilitarian Individualism (5)                      | -0.249*** | -0.229*** | -0.046    | 0.151***  | 1         | -0.169*** |
| <i>Knowledge</i>               | On antibiotics and resistance (6)                  | 0.057*    | 0.190***  | 0.140***  | -0.170*** | -0.169*** | 1         |
| <i>Health beliefs</i>          | Perceived severity (7)                             | 0.103***  | 0.220***  | 0.118***  | -0.074**  | -0.269*** | 0.398***  |
|                                | Awareness on risk of non-prudent use (8)           | 0.065**   | 0.264***  | 0.165***  | -0.116*** | -0.176*** | 0.376***  |
|                                | Proxy on prudent use (9)                           | -0.007    | 0.077**   | 0.169***  | -0.138*** | -0.235*** | 0.280***  |
|                                | Perceived susceptibility (10)                      | -0.013    | 0.083***  | -0.027    | 0.053*    | -0.011    | 0.012     |
| <i>Dependent</i>               | General awareness about antibiotic resistance (11) | 0.066**   | 0.236***  | 0.191***  | -0.139*** | -0.281*** | 0.440***  |

  

| <i>Variables</i>               |                                                    | (7)       | (8)       | (9)       | (10)     | (11)      |
|--------------------------------|----------------------------------------------------|-----------|-----------|-----------|----------|-----------|
| <i>Cultural predisposition</i> | Holism (1)                                         | 0.103***  | 0.065**   | -0.007    | -0.013   | 0.066**   |
|                                | Environmental concern (2)                          | 0.220***  | 0.264***  | 0.077**   | 0.083*** | 0.236***  |
|                                | Institutional trust (3)                            | 0.118***  | 0.165***  | 0.169***  | -0.027   | 0.191***  |
|                                | Anomie (4)                                         | -0.074**  | -0.116*** | -0.138*** | 0.053*   | -0.139*** |
|                                | Utilitarian Individualism (5)                      | -0.269*** | -0.176*** | -0.235*** | -0.011   | -0.281*** |
| <i>Knowledge</i>               | On antibiotics and resistance (6)                  | 0.398***  | 0.376***  | 0.280***  | 0.012    | 0.440***  |
| <i>Health beliefs</i>          | Perceived severity (7)                             | 1         | 0.520***  | 0.502***  | 0.051*   | 0.826***  |
|                                | Awareness on risk of non-prudent use (8)           | 0.520***  | 1         | 0.348***  | 0.0151   | 0.798***  |
|                                | Proxy on prudent use (9)                           | 0.502***  | 0.348***  | 1         | -0.060*  | 0.769***  |
|                                | Perceived susceptibility (10)                      | 0.051*    | 0.151***  | -0.060*   | 1        | 0.063**   |
| <i>Dependent</i>               | General awareness about antibiotic resistance (11) | 0.826***  | 0.798***  | 0.769***  | 0.063**  | 1         |

Note: N = 1779 for cultural predispositions, N = 1780 for knowledge and health beliefs

**Appendix 4.** Cluster analysis on cultural predispositions (N=1779)

|           | Institutional trust |      | Utilitarian individualism |      | Anomie |      | Environmental concern |      |
|-----------|---------------------|------|---------------------------|------|--------|------|-----------------------|------|
|           | Mean                | S.D. | Mean                      | S.D. | Mean   | S.D. | Mean                  | S.D. |
| Trusting  | 3.70                | 0.44 | 2.20                      | 0.36 | 2.27   | 0.44 | 3.36                  | 0.50 |
| Apathetic | 2.73                | 0.66 | 2.51                      | 0.49 | 3.27   | 0.58 | 2.54                  | 0.41 |
| Worried   | 2.69                | 0.50 | 2.01                      | 0.40 | 2.97   | 0.59 | 3.40                  | 0.40 |
| Average   | 3.09                | 0.72 | 2.25                      | 0.46 | 2.80   | 0.69 | 3.09                  | 0.60 |
